# Supplementary material
Source: PubMed Central journal article supplement (PMC4076359)

Supplemental data (S1)

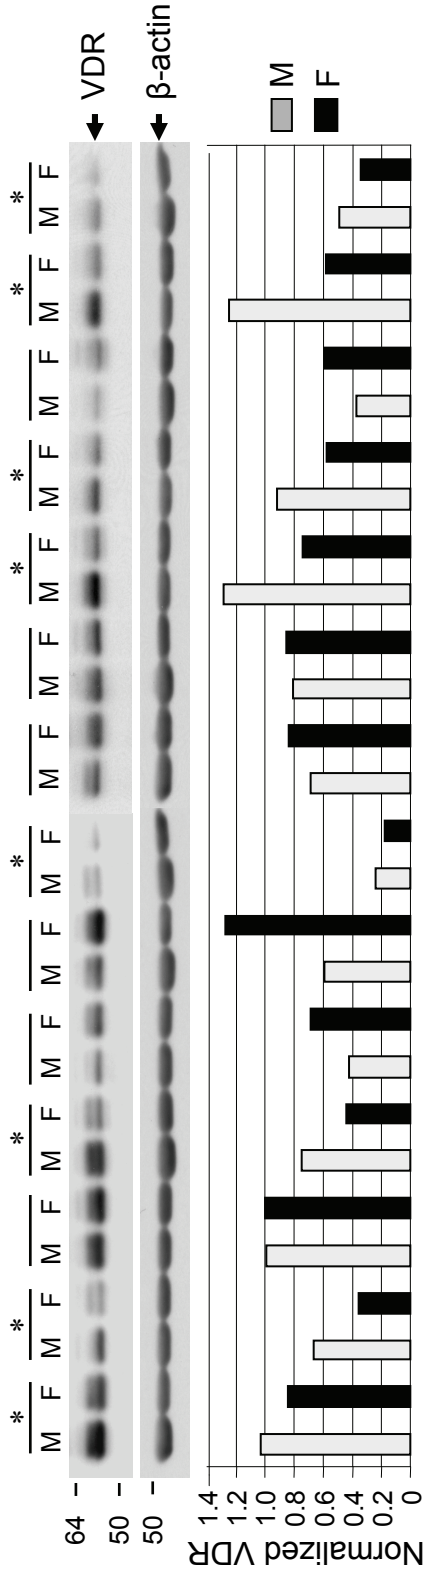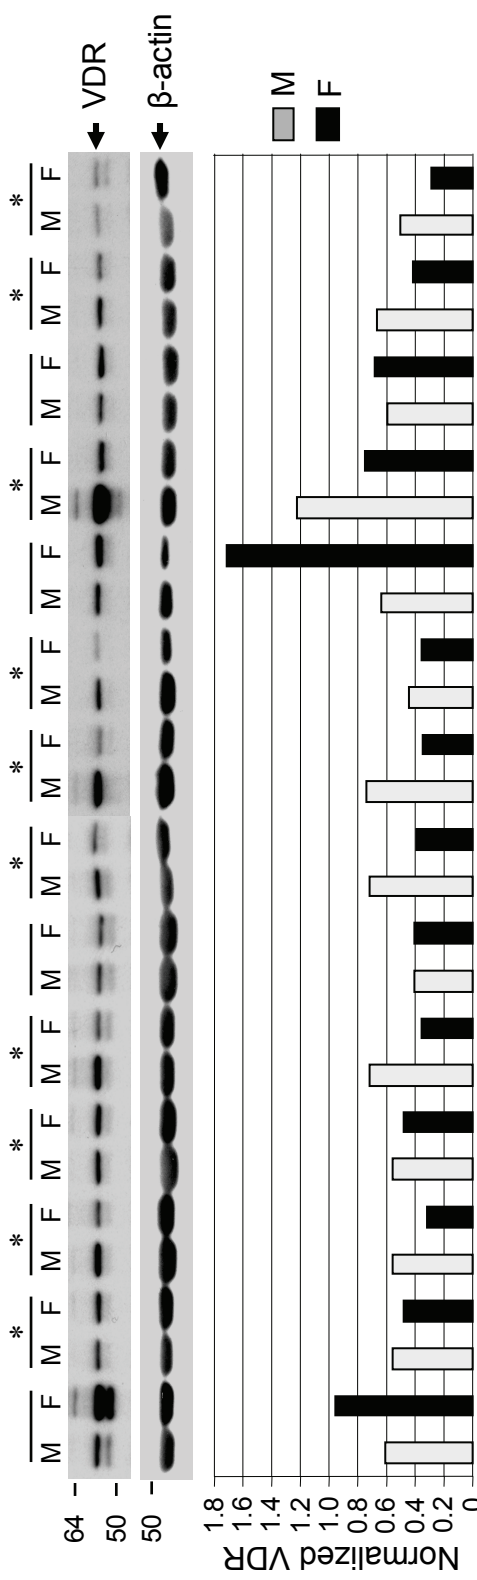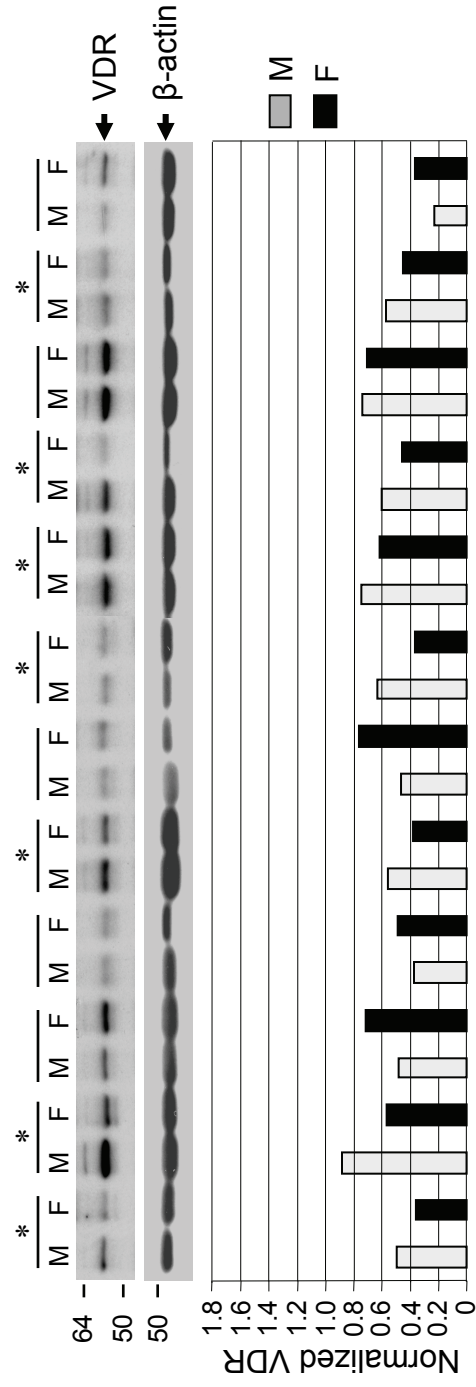

Supplement: supp_113.107714_SupplFigS1.pdf [file supp_113.107714_SupplFigS1.pdf]
